# Supplementary material
Source: PubMed Central journal article supplement (PMC5975381)

## Supplementary Material

### Spatiotemporal characteristics of PM<sub>2.5</sub> and PM<sub>10</sub> at 23 cities and background sites in China

Lizhong Xu<sup>1</sup>, Stuart Batterman<sup>2</sup>\*, Fang Chen<sup>3</sup>, Jiabing Li<sup>1</sup>, Xuefen Zhong<sup>4</sup>, Yongjie Feng<sup>5</sup>,  
Rao Qinghua<sup>3</sup>, Feng Chen<sup>6</sup>

<sup>1</sup> College of Environmental Science and Engineering, Fujian Normal University, Fuzhou, 350007, China

<sup>2</sup> School of Public Health, University of Michigan, Ann Arbor, Michigan, 48104, US

<sup>3</sup> College of Ocean Science and Biochemistry Engineering, Fuqing Branch of Fujian Normal University, Fuqing, 350300, China

<sup>4</sup> China Petrochemical Fujian Oil Production Company, Fuzhou, 350007, China

<sup>5</sup> Henan Langtian Environmental Protection Technology Company, Zhengzhou, 450000, China

<sup>6</sup> Fuzhou Environmental Monitoring Station, Fuzhou, 350007, China

#### Contents

**Table S1.** Comparison of PM level from different sources.

**Table S2.** Annual average concentrations of PM<sub>2.5</sub> and PM<sub>10</sub> at city and contrast sites.

**Table S3.** Spatial autocorrelation indices for PM<sub>2.5</sub> and PM<sub>10</sub> at urban and contrast sites, and for urban increments.

**Table S4.** Spearman rank correlation coefficients for daily PM concentrations across sites.

**Table S5.** Results of factor analyses for PM<sub>2.5</sub> and PM<sub>10</sub>.

**Table S6.** Comparison of weekend and weekday concentrations across study period at each site.

**Figure S1.** Locations of the 23 cities.

**Figure S2.** Contrast versus urban annual average concentrations at the 23 cities for PM<sub>2.5</sub> and PM<sub>10</sub>.

**Figure S3.** Annual average PM<sub>2.5</sub> and PM<sub>10</sub> concentrations by region.

**Figure S4.** Contrast and urban increment concentrations for PM<sub>10</sub> by deciles at each site, plus 23-site average.

**Figure S5.** Trends of PM<sub>2.5</sub> and PM<sub>10</sub> concentrations over pollution episodes in February 2014 at (A) Shijiazhuang (S4) and (B) Haikou (S19).

**Figure S6.** Weekend/weekday ratios of PM<sub>2.5</sub> and PM<sub>10</sub> concentrations at city and contrast sites for 1-year period and for winter.

**Table S1.** Comparison of PM level from different sources (indicated below).

| Site | City         | City-wide PM <sub>2.5</sub> concentration                              |                                                                        |                                                                        |                                                  | City-wide PM <sub>10</sub> concentration                               |                                                                        |                                                                        |                                                  |
|------|--------------|------------------------------------------------------------------------|------------------------------------------------------------------------|------------------------------------------------------------------------|--------------------------------------------------|------------------------------------------------------------------------|------------------------------------------------------------------------|------------------------------------------------------------------------|--------------------------------------------------|
|      |              | Apr 2013-<br>Mar 2014<br>(excluding<br>contrast<br>site) <sup>*1</sup> | Apr 2013-<br>Mar 2014<br>(including<br>contrast<br>site) <sup>*1</sup> | Mar 2013-<br>Feb 2014<br>(including<br>contrast<br>site) <sup>*2</sup> | Jan 2013-<br>Dec 2013<br>(official<br>statement) | Apr 2013-<br>Mar 2014<br>(excluding<br>contrast<br>site) <sup>*1</sup> | Apr 2013-<br>Mar 2014<br>(including<br>contrast<br>site) <sup>*1</sup> | Mar 2013-<br>Feb 2014<br>(including<br>contrast<br>site) <sup>*2</sup> | Jan 2013-<br>Dec 2013<br>(official<br>statement) |
| S1   | Harbin       | 74                                                                     | 71                                                                     | 73                                                                     | 81                                               | 112                                                                    | 110                                                                    | 107                                                                    | 119 <sup>*3</sup>                                |
| S2   | Changchun    | 64                                                                     | 63                                                                     | 60                                                                     | 73                                               | 110                                                                    | 113                                                                    | 111                                                                    | 129 <sup>*4</sup>                                |
| S3   | Beijing      | 85                                                                     | 84                                                                     | 87                                                                     | 89.5                                             | 115                                                                    | 112                                                                    | 109                                                                    | 108 <sup>*5</sup>                                |
| S4   | Shijiazhuang | 148                                                                    | 143                                                                    | 144                                                                    |                                                  | 295                                                                    | 284                                                                    | 287                                                                    |                                                  |
| S5   | Zhengzhou    | 100                                                                    | 99                                                                     | 95                                                                     | 108                                              | 155                                                                    | 157                                                                    | 154                                                                    | 170 <sup>*6</sup>                                |
| S6   | Taiyuan      |                                                                        |                                                                        | 69                                                                     |                                                  | 136                                                                    | 133                                                                    | 137                                                                    |                                                  |
| S7   | Xi'an        | 95                                                                     | 97                                                                     | 97                                                                     | 105                                              | 170                                                                    | 171                                                                    | 181                                                                    | 190 <sup>*7</sup>                                |
| S8   | Yinchuan     | 50                                                                     | 46                                                                     | 43                                                                     | 51                                               | 111                                                                    | 103                                                                    | 101                                                                    | 118 <sup>*8</sup>                                |
| S9   | Lanzhou      | 64                                                                     | 60                                                                     | 66                                                                     |                                                  | 142                                                                    | 136                                                                    | 148                                                                    | 153 <sup>*9</sup>                                |
| S10  | Xining       | 65                                                                     | 63                                                                     | 67                                                                     | 70                                               | 139                                                                    | 133                                                                    | 156                                                                    | 163 <sup>*10</sup>                               |
| S11  | Chengdu      | 93                                                                     | 89                                                                     | 89                                                                     | 97                                               | 141                                                                    | 132                                                                    | 145                                                                    | 150 <sup>*11</sup>                               |
| S12  | Chongqing    | 69                                                                     | 68                                                                     | 67                                                                     | 70                                               | 100                                                                    | 98                                                                     | 100                                                                    | 106 <sup>*12</sup>                               |
| S13  | Guiyang      | 51                                                                     | 49                                                                     | 52                                                                     | 53                                               | 73                                                                     | 71                                                                     | 75                                                                     | 86 <sup>*13</sup>                                |
| S14  | Kunming      | 41                                                                     | 37                                                                     | 37                                                                     | 42                                               | 78                                                                     | 72                                                                     | 70                                                                     | 82 <sup>*14</sup>                                |
| S15  | Nanning      | 60                                                                     | 59                                                                     | 58                                                                     | 57                                               | 92                                                                     | 92                                                                     | 89                                                                     | 90 <sup>*15</sup>                                |
| S16  | Guangzhou    | 53                                                                     | 52                                                                     | 52                                                                     | 53                                               | 74                                                                     | 73                                                                     | 72                                                                     | 72 <sup>*16</sup>                                |
| S17  | Fuzhou       | 34                                                                     | 33                                                                     | 34                                                                     | 36                                               | 62                                                                     | 66                                                                     | 66                                                                     | 64 <sup>*17</sup>                                |
| S18  | Xiamen       | 36                                                                     | 34                                                                     |                                                                        | 36                                               | 61                                                                     | 56                                                                     |                                                                        | 62 <sup>*18</sup>                                |
| S19  | Haikou       | 33                                                                     | 31                                                                     | 27                                                                     | 27                                               | 53                                                                     | 51                                                                     | 46                                                                     | 47 <sup>*19</sup>                                |
| S20  | Hefei        | 89                                                                     | 87                                                                     | 86                                                                     | 88                                               | 120                                                                    | 123                                                                    | 125                                                                    | 115 <sup>*20</sup>                               |
| S21  | Wuhan        | 90                                                                     | 89                                                                     | 92                                                                     | 94                                               | 127                                                                    | 124                                                                    | 135                                                                    | 124 <sup>*21</sup>                               |
| S22  | Changsha     | 76                                                                     | 77                                                                     | 81                                                                     |                                                  | 91                                                                     | 93                                                                     | 103                                                                    |                                                  |
| S23  | Zhuzhou      | 83                                                                     | 81                                                                     |                                                                        | 77                                               | 108                                                                    | 106                                                                    |                                                                        | 101 <sup>*22</sup>                               |

\*1: calculated by our data

\*2: cited from Wang (2014) except noted

\*3: <http://www.hrbhbj.gov.cn/zwx/hjzl/hjzkgb/2014/06/9629.htm?id=8a8182814641cbbf014664a7c3670738>

\*4: [http://www.ccepb.gov.cn/sjzx/zkgb/201410/t20141020\\_1332835.htm](http://www.ccepb.gov.cn/sjzx/zkgb/201410/t20141020_1332835.htm)

\*5: <http://www.bjepb.gov.cn/bjepb/413526/413663/413717/413719/index.html>

\*6: <http://www.cdhb.gov.cn/quality/detail.aspx?contentid=6291>

\*7: [http://www.sjzhhb.gov.cn/cyportal2.3/template/site00\\_article@sjzhbj.jsp?article\\_id=297e62b94a6a7ded014acdea5a33210&parent\\_id=402882663fe4de03013fe4e9defe025e&parentType=0&siteID=site00&f\\_channel\\_id=null&a1b2dd=7xaac](http://www.sjzhhb.gov.cn/cyportal2.3/template/site00_article@sjzhbj.jsp?article_id=297e62b94a6a7ded014acdea5a33210&parent_id=402882663fe4de03013fe4e9defe025e&parentType=0&siteID=site00&f_channel_id=null&a1b2dd=7xaac)

\*8: <http://www.hnep.gov.cn/tabid/435/InfoID/11750/Default.aspx>

\*9: <http://www.xaepb.gov.cn/websac/cat/2008824.html>

\*10: <http://www.nxep.gov.cn/pdf/2013gongbao1.pdf>

\*11: [http://lz.lanzhou.cn/system/2014/06/05/010638426\\_01.shtml](http://lz.lanzhou.cn/system/2014/06/05/010638426_01.shtml)

\*12: <http://www.xnepb.gov.cn/Article/Content/?id=6271>

\*13: <http://www.cdepb.gov.cn/cdepbws/Web/Template/GovDefaultInfo.aspx?cid=652&aid=94EB60E000B94D908FB6315681195623>

\*14: <http://www.cepb.gov.cn/doc/2014/06/03/13821.shtml>

\*15: <http://www.ghb.gov.cn/doc/201465/997424092.html>

\*16: <http://www.knepb.gov.cn/zwgk/hmhjzkgb/2013nkmhjzlg/20624.htm>

\*17: <http://www.nnhb.gov.cn/contents/c8ed7c74-52f8-4a27-98f0-ff21a890b769.shtml>

\*18: <http://www.gzepb.gov.cn/zwgk/hjgb/201403/P020140317428714304067.pdf>

\*19: [http://www.fzhjbh.gov.cn/5606-152/gov\\_statistics/InfoShow.aspx](http://www.fzhjbh.gov.cn/5606-152/gov_statistics/InfoShow.aspx)

\*20: [http://www.xnepb.gov.cn/zwgk/ghcw/hjzlg/201501/t20150112\\_1033710.htm](http://www.xnepb.gov.cn/zwgk/ghcw/hjzlg/201501/t20150112_1033710.htm)

\*21: <http://www.hkhbj.gov.cn/hjzl/hjzb/default.aspx>

\*22: <http://www.hfepb.gov.cn/NewsNR.aspx?NewsID=14679>

\*23: <http://www.whemc.cn/news/2015217/n02201669.html>

\*24: <http://www.lusong.gov.cn/hjbf/20150108/104542.shtml>

**Table S2.** Annual and seasonal average concentrations of PM<sub>2.5</sub> and PM<sub>10</sub> at city and contrast sites in µg m<sup>-3</sup>. St. Dev. denotes standard deviation. COV denotes coefficient of variation (%).

| Site Code | PM <sub>2.5</sub> Concentration |     |     |     |      |          |     |     |     |      | PM <sub>10</sub> Concentration |     |     |     |      |          |     |     |     |      |
|-----------|---------------------------------|-----|-----|-----|------|----------|-----|-----|-----|------|--------------------------------|-----|-----|-----|------|----------|-----|-----|-----|------|
|           | Urban                           |     |     |     |      | Contrast |     |     |     |      | Urban                          |     |     |     |      | Contrast |     |     |     |      |
|           | Year                            | Win | Spr | Sum | Fall | Year     | Win | Spr | Sum | Fall | Year                           | Win | Spr | Sum | Fall | Year     | Win | Spr | Sum | Fall |
| S1        | 74                              | 131 | 48  | 31  | 87   | 61       | 111 | 42  | 25  | 69   | 112                            | 172 | 91  | 60  | 126  | 89       | 139 | 74  | 48  | 98   |
| S2        | 63                              | 91  | 56  | 36  | 72   | 53       | 89  | 48  | 24  | 54   | 117                            | 133 | 132 | 81  | 128  | 78       | 121 | 84  | 38  | 72   |
| S3        | 85                              | 105 | 79  | 76  | 80   | 67       | 84  | 67  | 60  | 58   | 115                            | 133 | 124 | 99  | 104  | 86       | 87  | 105 | 75  | 63   |
| S4        | 148                             | 250 | 115 | 92  | 148  | 97       | 136 | 85  | 64  | 111  | 295                            | 401 | 267 | 222 | 300  | 190      | 222 | 201 | 145 | 201  |
| S5        | 100                             | 132 | 86  | 75  | 102  | 102      | 136 | 81  | 86  | 102  | 155                            | 184 | 148 | 126 | 160  | 166      | 194 | 150 | 153 | 165  |
| S6        | 65                              | 119 | 62  | 53  | -    | 52       | 62  | 49  | 49  | 47   | 137                            | 152 | 146 | 106 | -    | 95       | 93  | 113 | 88  | 82   |
| S7        | 95                              | 163 | 73  | 50  | 75   | 116      | 205 | 81  | 56  | 106  | 170                            | 251 | 162 | 95  | 130  | 196      | 290 | 150 | 130 | 207  |
| S8        | 50                              | 76  | 43  | 26  | 47   | 28       | 41  | 24  | 17  | 26   | 111                            | 132 | 128 | 61  | 108  | 63       | 73  | 74  | 42  | 59   |
| S9        | 64                              | 72  | 63  | 52  | 67   | 43       | 59  | 37  | 27  | 45   | 142                            | 133 | 159 | 127 | 146  | 113      | 119 | 128 | 85  | 117  |
| S10       | 65                              | 85  | 63  | 51  | 58   | 54       | 69  | 58  | 37  | 49   | 139                            | 152 | 173 | 107 | 115  | 103      | 127 | 118 | 67  | 95   |
| S11       | 93                              | 150 | 85  | 53  | 76   | 57       | 88  | 53  | 36  | 51   | 141                            | 212 | 137 | 89  | 113  | 74       | 95  | 78  | 52  | 68   |
| S12       | 69                              | 113 | 52  | 40  | 72   | 40       | 63  | 30  | 27  | 34   | 100                            | 152 | 84  | 69  | 95   | 65       | 99  | 55  | 39  | 56   |
| S13       | 51                              | 79  | 46  | 26  | 52   | 33       | 55  | 28  | 14  | 33   | 73                             | 96  | 72  | 49  | 79   | 49       | 68  | 52  | 25  | 48   |
| S14       | 39                              | 44  | 43  | 26  | 40   | 23       | 23  | 28  | 14  | 23   | 78                             | 71  | 87  | 65  | 75   | 40       | 39  | 53  | 24  | 37   |
| S15       | 60                              | 92  | 50  | 23  | 67   | 54       | 86  | 46  | 24  | 59   | 92                             | 135 | 78  | 42  | 107  | 83       | 124 | 69  | 43  | 93   |
| S16       | 53                              | 74  | 52  | 29  | 55   | 49       | 63  | 42  | 23  | 49   | 74                             | 96  | 71  | 45  | 83   | 64       | 80  | 57  | 39  | 63   |
| S17       | 34                              | 47  | 39  | 22  | 29   | 26       | 45  | 28  | 17  | 24   | 66                             | 70  | 79  | 56  | 59   | 41       | 41  | 59  | 28  | 32   |
| S18       | 36                              | 47  | 41  | 22  | 33   | 28       | 38  | 29  | 17  | 23   | 61                             | 70  | 70  | 43  | 63   | 41       | 60  | 49  | 23  | 33   |
| S19       | 33                              | 48  | 30  | 17  | 30   | 24       | 34  | 27  | 10  | 26   | 53                             | 67  | 52  | 35  | 53   | 46       | 49  | 50  | 31  | 45   |
| S20       | 87                              | 139 | 72  | 50  | 91   | 73       | 103 | 55  | 49  | 87   | 120                            | 180 | 111 | 92  | 121  | 116      | 152 | 103 | 80  | 129  |
| S21       | 90                              | 151 | 65  | 42  | 91   | 72       | 132 | 50  | 31  | 79   | 127                            | 192 | 103 | 65  | 149  | 98       | 153 | 77  | 63  | 112  |
| S22       | 76                              | 121 | 56  | 34  | 90   | 76       | 111 | 70  | 31  | 90   | 91                             | 110 | 94  | 57  | 113  | 95       | 125 | 96  | 58  | 100  |
| S23       | 82                              | 122 | 65  | 33  | 91   | 71       | 105 | 50  | 30  | 77   | 108                            | 152 | 94  | 49  | 120  | 103      | 136 | 95  | 47  | 110  |
| Average   | 70                              | 107 | 60  | 42  | 71   | 56       | 84  | 48  | 33  | 57   | 116                            | 150 | 116 | 80  | 116  | 91       | 117 | 91  | 62  | 91   |
| St.Dev.   | 26                              | 48  | 19  | 19  | 28   | 26       | 42  | 19  | 19  | 28   | 50                             | 73  | 47  | 41  | 50   | 44       | 60  | 39  | 37  | 49   |
| COV (%)   | 38                              | 45  | 31  | 47  | 39   | 45       | 50  | 39  | 57  | 49   | 43                             | 49  | 41  | 51  | 43   | 48       | 51  | 43  | 61  | 54   |

**Table S3.** Spatial autocorrelation indices (Moran's I and Geary's C) for PM<sub>2.5</sub> and PM<sub>10</sub> at urban and contrast sites, and for urban increments. Based on annual average concentrations. Bolded values exceed standard error.

| Metric                  | Lag<br>(km)         | Pairs of<br>Neighbors | Year or Season |         |        |         |               |         |               |         |              |         |
|-------------------------|---------------------|-----------------------|----------------|---------|--------|---------|---------------|---------|---------------|---------|--------------|---------|
|                         |                     |                       | Annual         | Winter  | Spring | Summer  | Fall          |         |               |         |              |         |
| <b>PM2.5 - Urban</b>    |                     |                       |                |         |        |         |               |         |               |         |              |         |
| <b>Moran's I</b>        | 0-500               | 26                    | <b>0.536</b>   | (0.182) | 0.409  | (0.182) | <b>0.545</b>  | (0.182) | <b>0.802</b>  | (0.182) | <b>0.575</b> | (0.182) |
|                         | 500-1000            | 80                    | 0.040          | (0.083) | 0.026  | (0.083) | 0.070         | (0.083) | 0.169         | (0.083) | -0.057       | (0.083) |
|                         | 1000-1500           | 76                    | -0.201         | (0.092) | -0.201 | (0.092) | -0.193        | (0.092) | -0.248        | (0.092) | -0.122       | (0.092) |
|                         | 1500-2000           | 39                    | -0.236         | (0.137) | -0.138 | (0.137) | -0.371        | (0.137) | <b>-0.620</b> | (0.137) | -0.115       | (0.137) |
|                         | 2000-2500           | 20                    | -0.239         | (0.190) | -0.166 | (0.190) | -0.267        | (0.190) | -0.332        | (0.190) | -0.274       | (0.190) |
| <b>Geary's C</b>        | 0-500               | 26                    | 0.542          | (0.216) | 0.623  | (0.216) | 0.535         | (0.216) | 0.384         | (0.216) | 0.491        | (0.216) |
|                         | 500-1000            | 80                    | 0.814          | (0.158) | 0.835  | (0.158) | 0.776         | (0.158) | 0.633         | (0.158) | 0.874        | (0.158) |
|                         | 1000-1500           | 76                    | 1.322          | (0.127) | 1.311  | (0.127) | 1.300         | (0.127) | 1.343         | (0.127) | 1.239        | (0.127) |
|                         | 1500-2000           | 39                    | 1.290          | (0.229) | 1.199  | (0.229) | 1.382         | (0.229) | 1.683         | (0.229) | 1.203        | (0.229) |
|                         | 2000-2500           | 20                    | 0.924          | (0.385) | 0.883  | (0.385) | 1.030         | (0.385) | 1.126         | (0.385) | 1.048        | (0.385) |
| <b>PM2.5 - Contrast</b> |                     |                       |                |         |        |         |               |         |               |         |              |         |
| <b>Moran's I</b>        | 0-500               | 26                    | <b>0.577</b>   | (0.182) | 0.425  | (0.182) | <b>0.510</b>  | (0.182) | <b>0.843</b>  | (0.182) | <b>0.588</b> | (0.182) |
|                         | 500-1000            | 80                    | -0.040         | (0.083) | -0.042 | (0.083) | -0.038        | (0.083) | 0.093         | (0.083) | -0.095       | (0.083) |
|                         | 1000-1500           | 76                    | -0.240         | (0.092) | -0.246 | (0.092) | -0.144        | (0.092) | -0.337        | (0.092) | -0.230       | (0.092) |
|                         | 1500-2000           | 39                    | -0.089         | (0.137) | 0.066  | (0.137) | -0.226        | (0.137) | -0.422        | (0.137) | 0.006        | (0.137) |
|                         | 2000-2500           | 20                    | -0.064         | (0.190) | 0.008  | (0.190) | -0.182        | (0.190) | -0.160        | (0.190) | -0.022       | (0.190) |
| <b>Geary's C</b>        | 0-500               | 26                    | 0.502          | (0.216) | 0.565  | (0.216) | 0.589         | (0.216) | 0.532         | (0.216) | 0.486        | (0.216) |
|                         | 500-1000            | 80                    | 1.138          | (0.158) | 1.222  | (0.158) | 1.061         | (0.158) | 0.815         | (0.158) | 1.150        | (0.158) |
|                         | 1000-1500           | 76                    | 1.223          | (0.127) | 1.149  | (0.127) | 1.169         | (0.127) | 1.403         | (0.127) | 1.253        | (0.127) |
|                         | 1500-2000           | 39                    | 0.958          | (0.229) | 0.803  | (0.229) | 1.121         | (0.229) | 1.319         | (0.229) | 0.871        | (0.229) |
|                         | <b>PM10 - Urban</b> |                       |                |         |        |         |               |         |               |         |              |         |
| <b>Moran's I</b>        | 0-500               | 26                    | 0.459          | (0.182) | 0.236  | (0.182) | <b>0.601</b>  | (0.182) | <b>0.615</b>  | (0.182) | 0.346        | (0.182) |
|                         | 500-1000            | 80                    | 0.206          | (0.083) | 0.138  | (0.083) | 0.277         | (0.083) | 0.209         | (0.083) | 0.111        | (0.083) |
|                         | 1000-1500           | 76                    | -0.200         | (0.092) | -0.190 | (0.092) | -0.199        | (0.092) | -0.235        | (0.092) | -0.116       | (0.092) |
|                         | 1500-2000           | 39                    | <b>-0.527</b>  | (0.137) | -0.280 | (0.137) | <b>-0.752</b> | (0.137) | <b>-0.616</b> | (0.137) | -0.353       | (0.137) |
|                         | 2000-2500           | 20                    | -0.224         | (0.190) | -0.163 | (0.190) | -0.292        | (0.190) | -0.216        | (0.190) | -0.252       | (0.190) |
| <b>Geary's C</b>        | 0-500               | 26                    | 0.693          | (0.216) | 0.837  | (0.216) | 0.536         | (0.216) | 0.625         | (0.216) | 0.832        | (0.216) |
|                         | 500-1000            | 80                    | 0.610          | (0.158) | 0.730  | (0.158) | 0.537         | (0.158) | 0.581         | (0.158) | 0.641        | (0.158) |
|                         | 1000-1500           | 76                    | 1.350          | (0.127) | 1.330  | (0.127) | 1.300         | (0.127) | 1.362         | (0.127) | 1.307        | (0.127) |
|                         | 1500-2000           | 39                    | 1.602          | (0.229) | 1.305  | (0.229) | 1.840         | (0.229) | 1.709         | (0.229) | 1.462        | (0.229) |
|                         | 2000-2500           | 20                    | 0.864          | (0.385) | 0.819  | (0.385) | 1.019         | (0.385) | 0.880         | (0.385) | 0.908        | (0.385) |
| <b>PM10 - Contrast</b>  |                     |                       |                |         |        |         |               |         |               |         |              |         |
| <b>Moran's I</b>        | 0-500               | 26                    | <b>0.618</b>   | (0.182) | 0.405  | (0.182) | <b>0.728</b>  | (0.182) | <b>0.861</b>  | (0.182) | <b>0.519</b> | (0.182) |
|                         | 500-1000            | 80                    | 0.069          | (0.083) | 0.003  | (0.083) | 0.159         | (0.083) | 0.131         | (0.083) | 0.009        | (0.083) |
|                         | 1000-1500           | 76                    | -0.272         | (0.092) | -0.226 | (0.092) | -0.239        | (0.092) | -0.393        | (0.092) | -0.251       | (0.092) |
|                         | 1500-2000           | 39                    | -0.334         | (0.137) | -0.089 | (0.137) | <b>-0.624</b> | (0.137) | -0.472        | (0.137) | -0.207       | (0.137) |
|                         | 2000-2500           | 20                    | -0.041         | (0.190) | 0.019  | (0.190) | -0.204        | (0.190) | -0.031        | (0.190) | 0.038        | (0.190) |
| <b>Geary's C</b>        | 0-500               | 26                    | 0.498          | (0.216) | 0.585  | (0.216) | 0.466         | (0.216) | 0.456         | (0.216) | 0.555        | (0.216) |
|                         | 500-1000            | 80                    | 0.989          | (0.158) | 1.151  | (0.158) | 0.750         | (0.158) | 0.844         | (0.158) | 1.052        | (0.158) |
|                         | 1000-1500           | 76                    | 1.296          | (0.127) | 1.186  | (0.127) | 1.317         | (0.127) | 1.438         | (0.127) | 1.276        | (0.127) |
|                         | 1500-2000           | 39                    | 1.208          | (0.229) | 0.946  | (0.229) | 1.604         | (0.229) | 1.336         | (0.229) | 1.088        | (0.229) |





**Table S6.** Comparison of weekend and weekday concentrations across study period at each site. Table shows median concentrations in  $\mu\text{g m}^{-3}$  for  $\text{PM}_{2.5}$  and  $\text{PM}_{10}$  at city and contrast sites, the ratio of these concentrations, and p-value from Mann-Whitney tests (1-sided, 2 independent samples). P-values below 0.05 are highlighted.

| Site                     | PM2.5 City     |                |                        |                     | PM2.5 Contrast |                |                        |                     | PM10 City      |                |                        |                     | PM10 Contrast  |                |                        |                     |
|--------------------------|----------------|----------------|------------------------|---------------------|----------------|----------------|------------------------|---------------------|----------------|----------------|------------------------|---------------------|----------------|----------------|------------------------|---------------------|
|                          | Weekend Median | Weekday Median | Ratio: Weekend/Weekday | MW p-value, 1-sided | Weekend Median | Weekday Median | Ratio: Weekend/Weekday | MW p-value, 1-sided | Weekend Median | Weekday Median | Ratio: Weekend/Weekday | MW p-value, 1-sided | Weekend Median | Weekday Median | Ratio: Weekend/Weekday | MW p-value, 1-sided |
| S1                       | 48             | 44             | 1.09                   | 0.24                | 34             | 32             | 1.06                   | 0.49                | 89             | 78             | 1.14                   | <b>0.04</b>         | 75             | 66             | 1.14                   | 0.13                |
| S2                       | 56             | 43             | 1.31                   | <b>0.00</b>         | 42             | 36             | 1.15                   | 0.05                | 111            | 97             | 1.15                   | <b>0.00</b>         | 62             | 51             | 1.22                   | <b>0.01</b>         |
| S3                       | 71             | 62             | 1.15                   | <b>0.04</b>         | 53             | 46             | 1.15                   | 0.14                | 111            | 98             | 1.14                   | <b>0.04</b>         | 68             | 70             | 0.96                   | 0.43                |
| S4                       | 127            | 115            | 1.10                   | 0.16                | 90             | 75             | 1.20                   | 0.31                | 289            | 270            | 1.07                   | 0.09                | 184            | 172            | 1.07                   | 0.35                |
| S5                       | 93             | 83             | 1.12                   | <b>0.02</b>         | 88             | 82             | 1.08                   | 0.06                | 151            | 141            | 1.07                   | <b>0.03</b>         | 152            | 150            | 1.01                   | 0.08                |
| S6                       | 63             | 54             | 1.18                   | <b>0.02</b>         | 53             | 38             | 1.39                   | <b>0.03</b>         | 137            | 126            | 1.08                   | <b>0.02</b>         | 87             | 83             | 1.05                   | 0.25                |
| S7                       | 70             | 75             | 0.94                   | 0.49                | 88             | 85             | 1.04                   | 0.34                | 143            | 144            | 0.99                   | 0.49                | 153            | 163            | 0.94                   | 0.47                |
| S8                       | 43             | 42             | 1.04                   | 0.15                | 24             | 24             | 1.00                   | 0.20                | 107            | 97             | 1.11                   | 0.08                | 56             | 53             | 1.06                   | 0.26                |
| S9                       | 63             | 59             | 1.06                   | 0.27                | 40             | 37             | 1.07                   | 0.20                | 132            | 128            | 1.03                   | 0.44                | 98             | 99             | 0.98                   | 0.44                |
| S10                      | 63             | 63             | 1.00                   | 0.48                | 47             | 50             | 0.93                   | 0.12                | 132            | 137            | 0.96                   | 0.31                | 85             | 94             | 0.90                   | 0.06                |
| S11                      | 74             | 78             | 0.95                   | 0.46                | 52             | 47             | 1.12                   | 0.10                | 123            | 127            | 0.97                   | 0.47                | 67             | 68             | 0.99                   | 0.15                |
| S12                      | 56             | 55             | 1.03                   | 0.48                | 32             | 34             | 0.94                   | 0.35                | 87             | 85             | 1.02                   | 0.38                | 52             | 55             | 0.95                   | 0.29                |
| S13                      | 43             | 46             | 0.93                   | 0.48                | 25             | 28             | 0.91                   | 0.47                | 69             | 68             | 1.02                   | 0.28                | 40             | 44             | 0.91                   | 0.43                |
| S14                      | 37             | 35             | 1.05                   | 0.16                | 23             | 19             | 1.18                   | 0.19                | 75             | 72             | 1.05                   | 0.14                | 38             | 35             | 1.09                   | 0.21                |
| S15                      | 49             | 50             | 0.98                   | 0.34                | 46             | 46             | 1.00                   | 0.34                | 83             | 77             | 1.08                   | 0.38                | 78             | 70             | 1.12                   | 0.15                |
| S16                      | 48             | 46             | 1.05                   | 0.48                | 48             | 42             | 1.14                   | 0.18                | 68             | 65             | 1.05                   | 0.44                | 60             | 59             | 1.02                   | 0.32                |
| S17                      | 31             | 29             | 1.07                   | 0.47                | 19             | 24             | 0.79                   | 0.12                | 61             | 62             | 0.98                   | 0.45                | 34             | 37             | 0.91                   | 0.22                |
| S18                      | 33             | 32             | 1.06                   | 0.36                | 22             | 25             | 0.88                   | 0.32                | 59             | 57             | 1.03                   | 0.46                | 36             | 34             | 1.07                   | 0.44                |
| S19                      | 30             | 24             | 1.27                   | 0.12                | 17             | 17             | 1.03                   | 0.12                | 52             | 44             | 1.18                   | 0.09                | 39             | 36             | 1.07                   | 0.14                |
| S20                      | 78             | 69             | 1.13                   | <b>0.04</b>         | 66             | 59             | 1.12                   | <b>0.04</b>         | 115            | 105            | 1.09                   | 0.12                | 107            | 97             | 1.10                   | 0.12                |
| S21                      | 75             | 74             | 1.02                   | 0.15                | 53             | 55             | 0.96                   | 0.38                | 122            | 109            | 1.12                   | 0.23                | 85             | 85             | 0.99                   | 0.22                |
| S22                      | 63             | 59             | 1.06                   | 0.19                | 65             | 64             | 1.01                   | 0.19                | 87             | 79             | 1.10                   | 0.25                | 92             | 87             | 1.06                   | 0.20                |
| S23                      | 72             | 66             | 1.10                   | 0.10                | 62             | 57             | 1.09                   | 0.20                | 98             | 93             | 1.05                   | 0.12                | 100            | 91             | 1.10                   | 0.13                |
| Average                  | 60             | 57             | 1.07                   | 0.25                | 47             | 44             | 1.05                   | 0.21                | 109            | 103            | 1.06                   | 0.23                | 80             | 78             | 1.03                   | 0.24                |
| No. Differences (P<0.05) |                |                |                        | 5                   |                |                |                        | 2                   |                |                |                        | 5                   |                |                |                        | 1                   |
| No. Differences (P<0.10) |                |                |                        | 6                   |                |                |                        | 4                   |                |                |                        | 8                   |                |                |                        | 3                   |

**Figure S1.** Locations of the 23 cities. Site numbers correspond to abbreviations in Table 1.

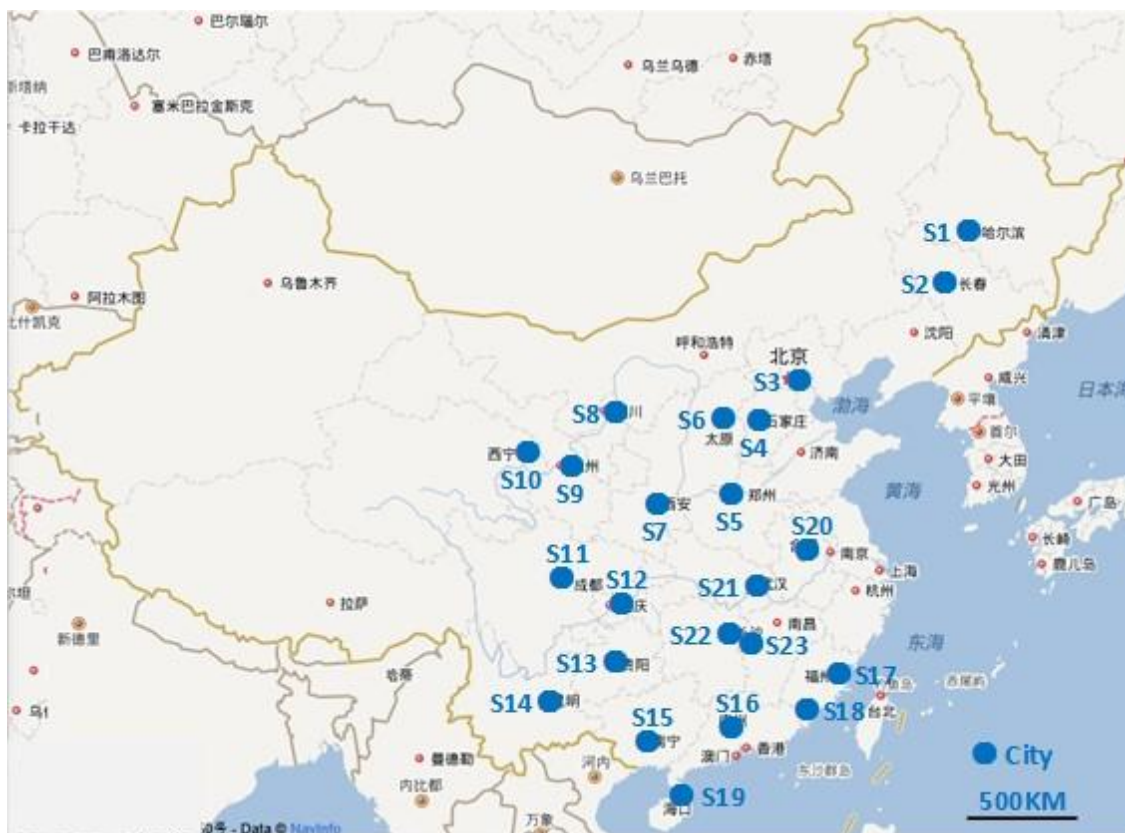

**Figure S2.** Contrast versus urban annual average concentrations at the 23 cities for PM<sub>2.5</sub> (left) and PM<sub>10</sub> (right).

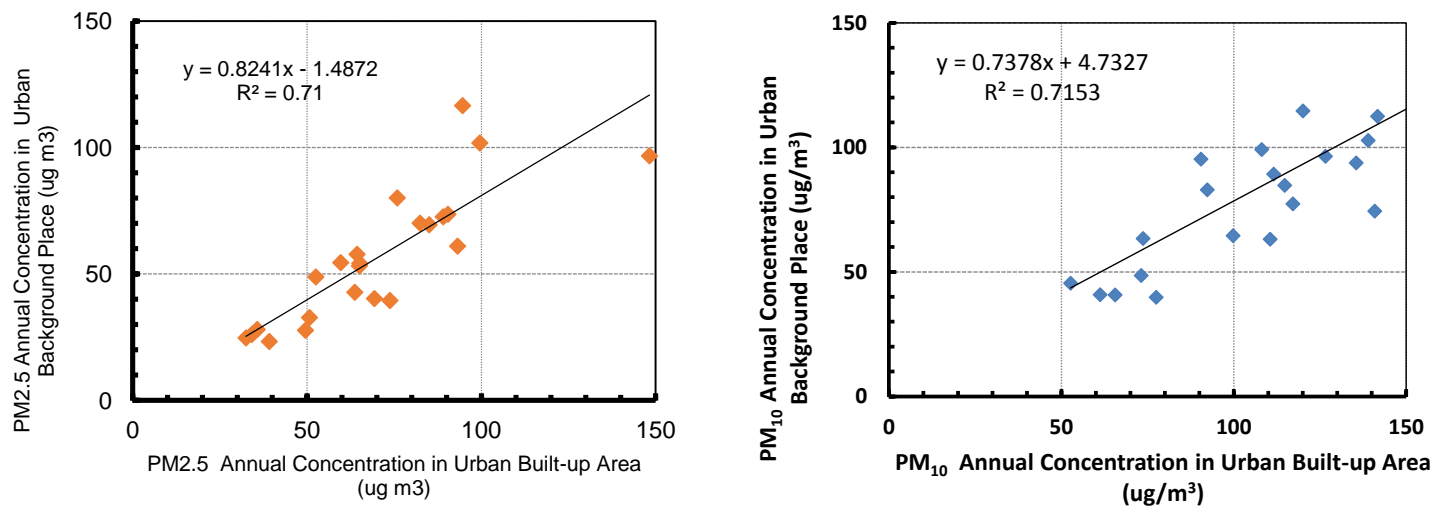



**Figure S3.** Annual average PM<sub>2.5</sub> and PM<sub>10</sub> concentrations by region. Error bars shows standard deviation among sites in region.

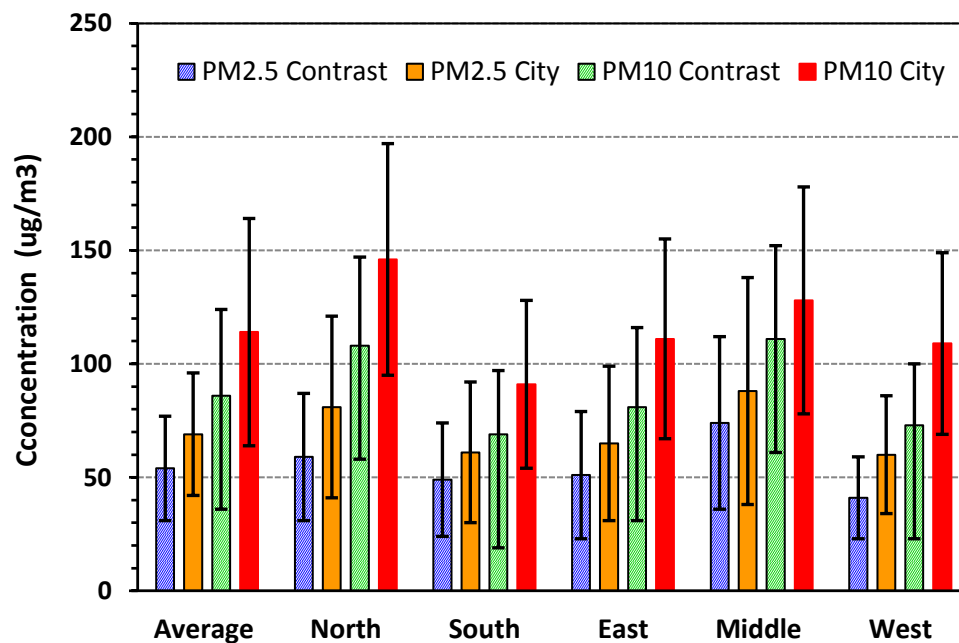

**Figure S4.** Contrast and urban increment concentrations for PM<sub>10</sub> by deciles at each site, plus 23-site average.

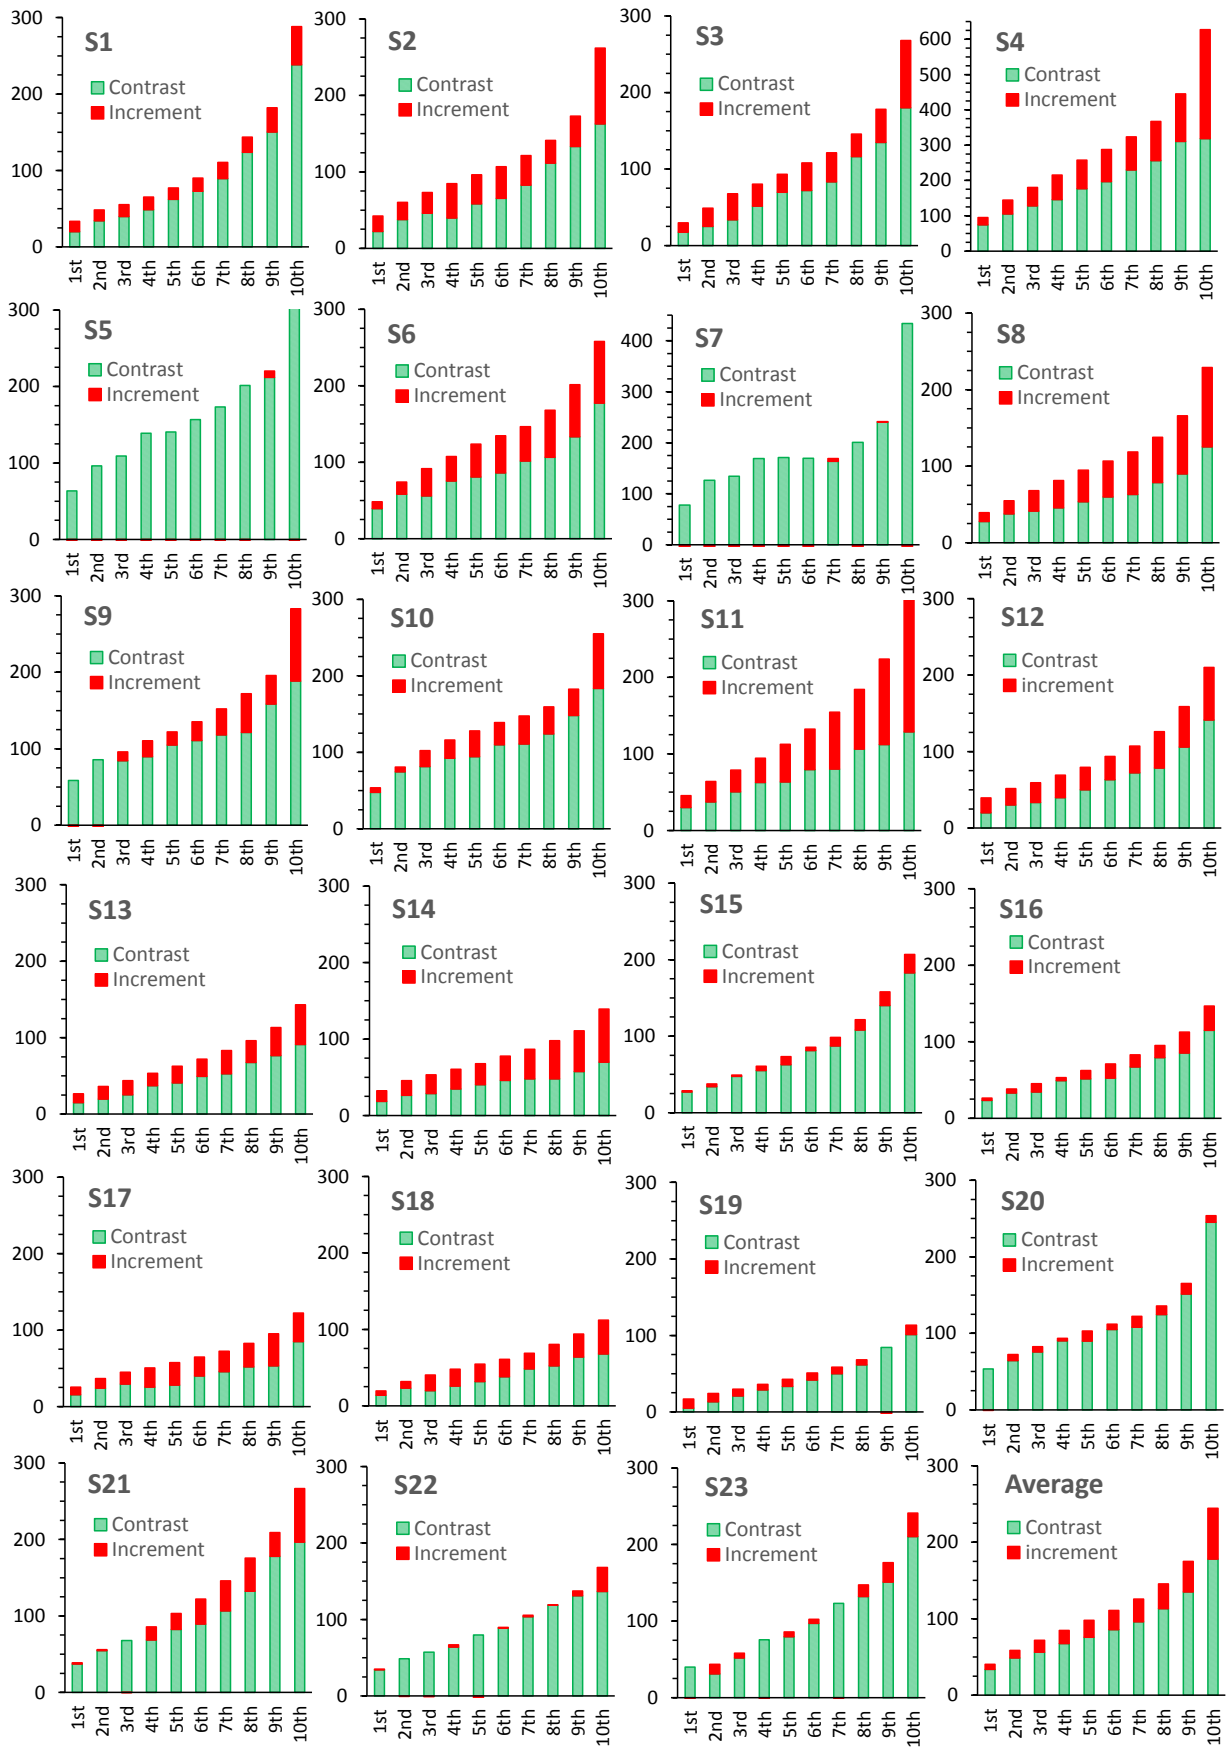

**Figure S5.** Trends of PM<sub>2.5</sub> and PM<sub>10</sub> concentrations over pollution episodes in February 2014 at (A) Shijiazhuang (S4) and (B) Haikou (S19).

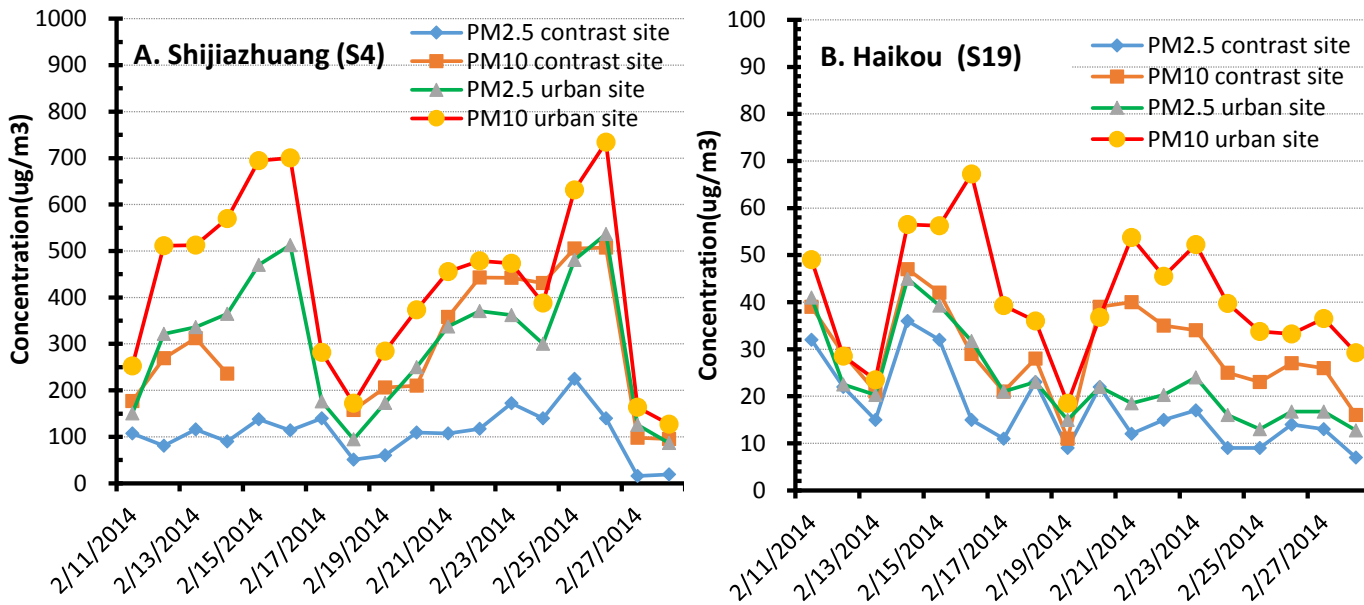

**Figure S6.** Weekend/weekday ratios of PM<sub>2.5</sub> and PM<sub>10</sub> concentrations at city and contrast sites for study period (1-year period; top) for winter period (Dec., Jan., Feb.; bottom).

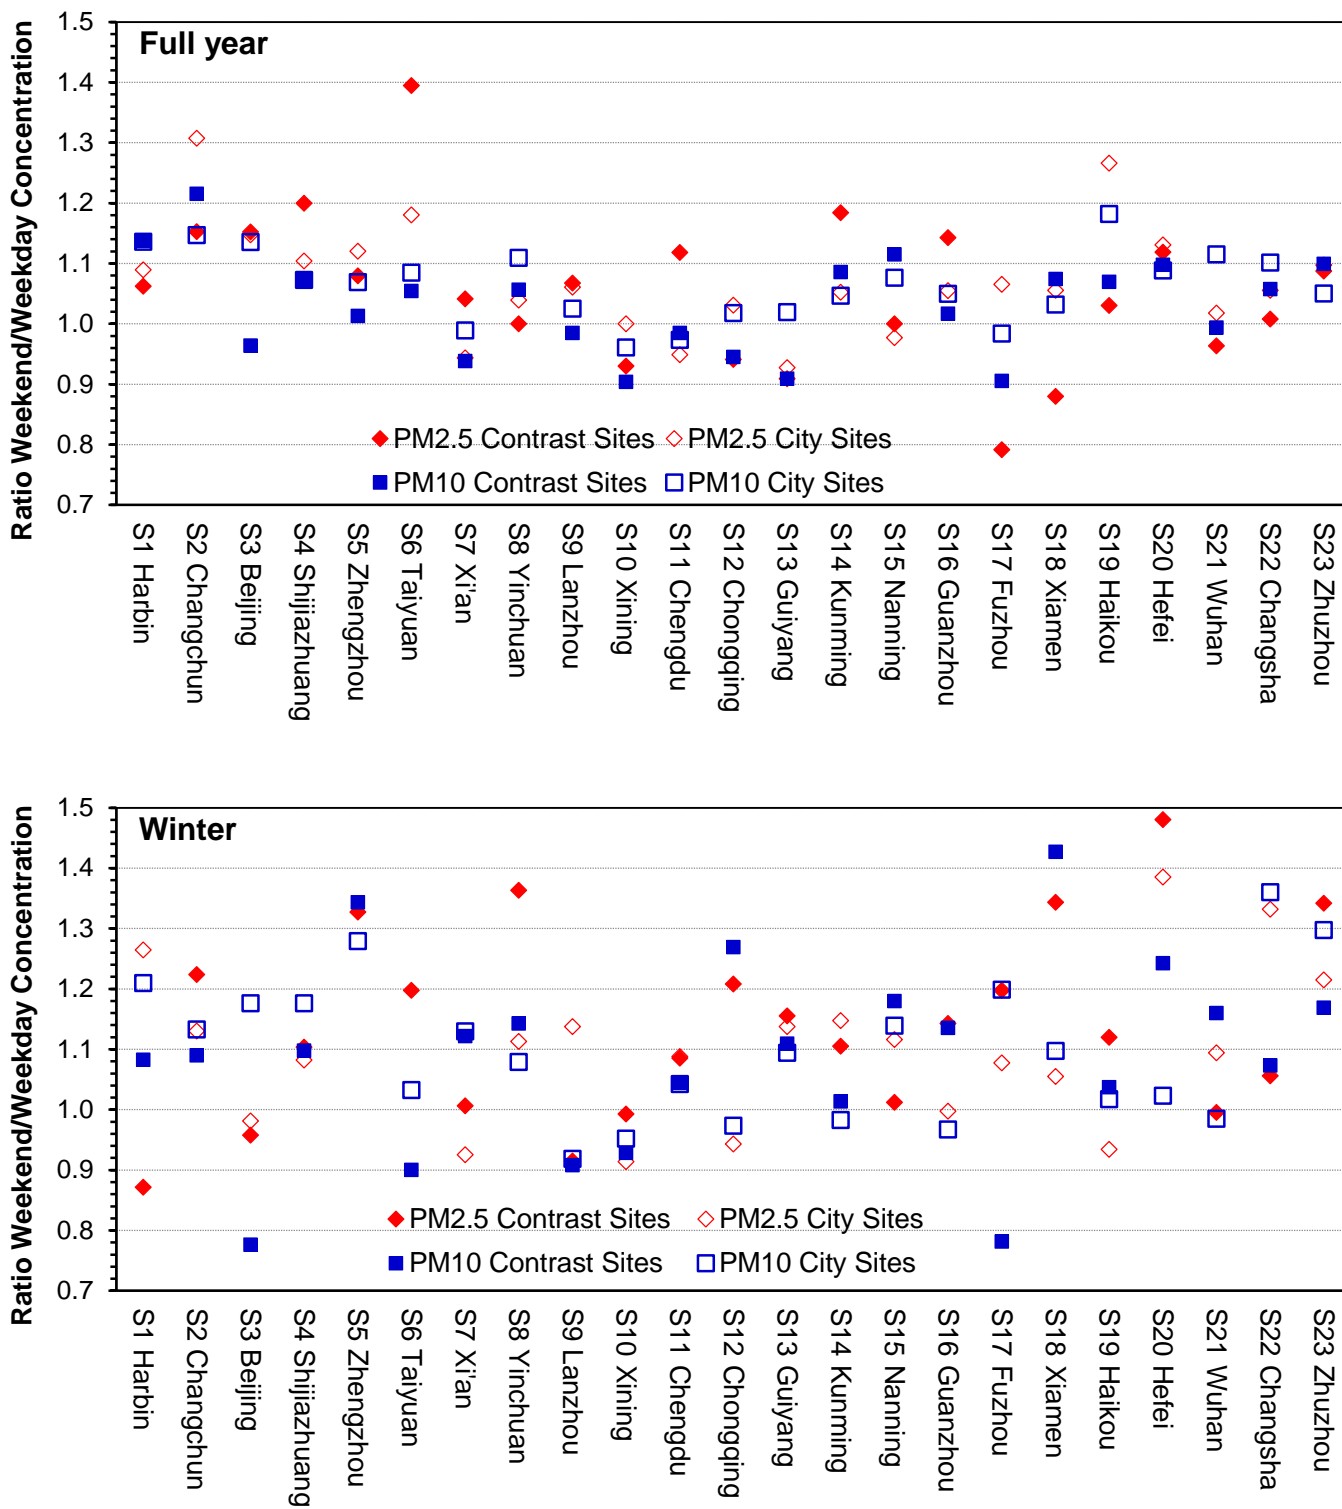

Supplement: NIHMS947956-supplement.pdf [file NIHMS947956-supplement.pdf]
